# Supplementary material for: High efficiency of mechanosynthesized Zn-based metal–organic frameworks in photodegradation of congo red under UV and visible light
Source: Royal Society of Chemistry journal article supplement (doi:10.1039/c5ra24238j), 2016-01-01
Supplement: c5ra24238j1.pdf [file c5ra24238j1.pdf]

## Supplementary Information

### High efficiency of mechanothesized Zn-based metal-organic frameworks in photodegradation of congo red under UV and visible light

Mohammad Yaser Masoomi‡, Minoo Bagheri‡ and Ali Morsali\*

Department of Chemistry, Faculty of Sciences, TarbiatModares University, P.O. Box 14115-  
175, Tehran, Islamic Republic of Iran

Email: [Morsali\\_a@modares.ac.ir](mailto:Morsali_a@modares.ac.ir), [Morsali\\_a@yahoo.com](mailto:Morsali_a@yahoo.com)

‡ These authors contributed equally to this work.

**Table S1.** Photocatalytic properties of TMU-6 in presence of various concentrations of CR.

| [CR] (ppm) | Removal % (Blank) | T <sub>dark</sub> (min) | Adsorption % | T <sub>Removal</sub> (min) | Removal % |
|------------|-------------------|-------------------------|--------------|----------------------------|-----------|
| 50         | 0                 | 50                      | 98.8         | -                          | -         |
| 100        | 0.005             | 35                      | 39.4         | 90                         | 98.3      |
| 150        | 0.005             | 40                      | 41.2         | 180                        | 87.5      |
| 200        | 0.006             | 40                      | 42.8         | 180                        | 75.4      |

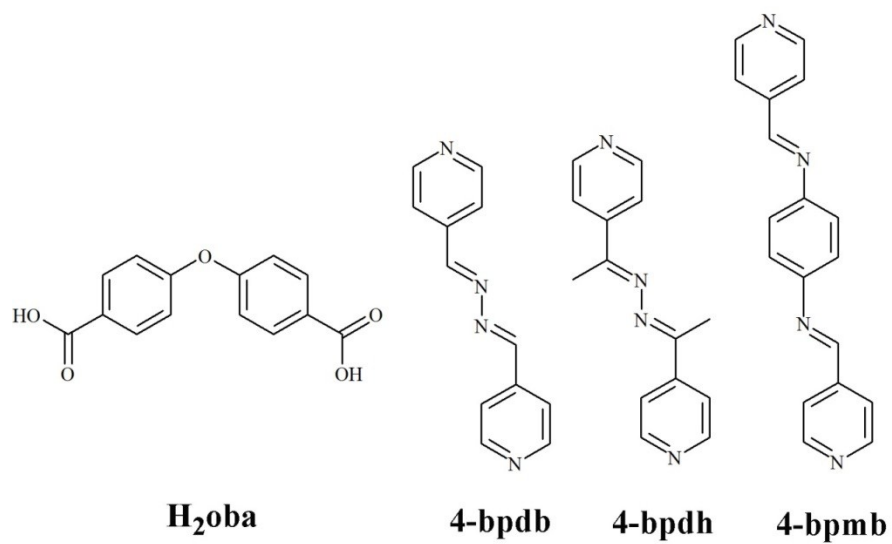

**Fig. S1.** Chemical structure of H<sub>2</sub>oba, 4-bpdb, 4-bpdh and 4-bpmb.

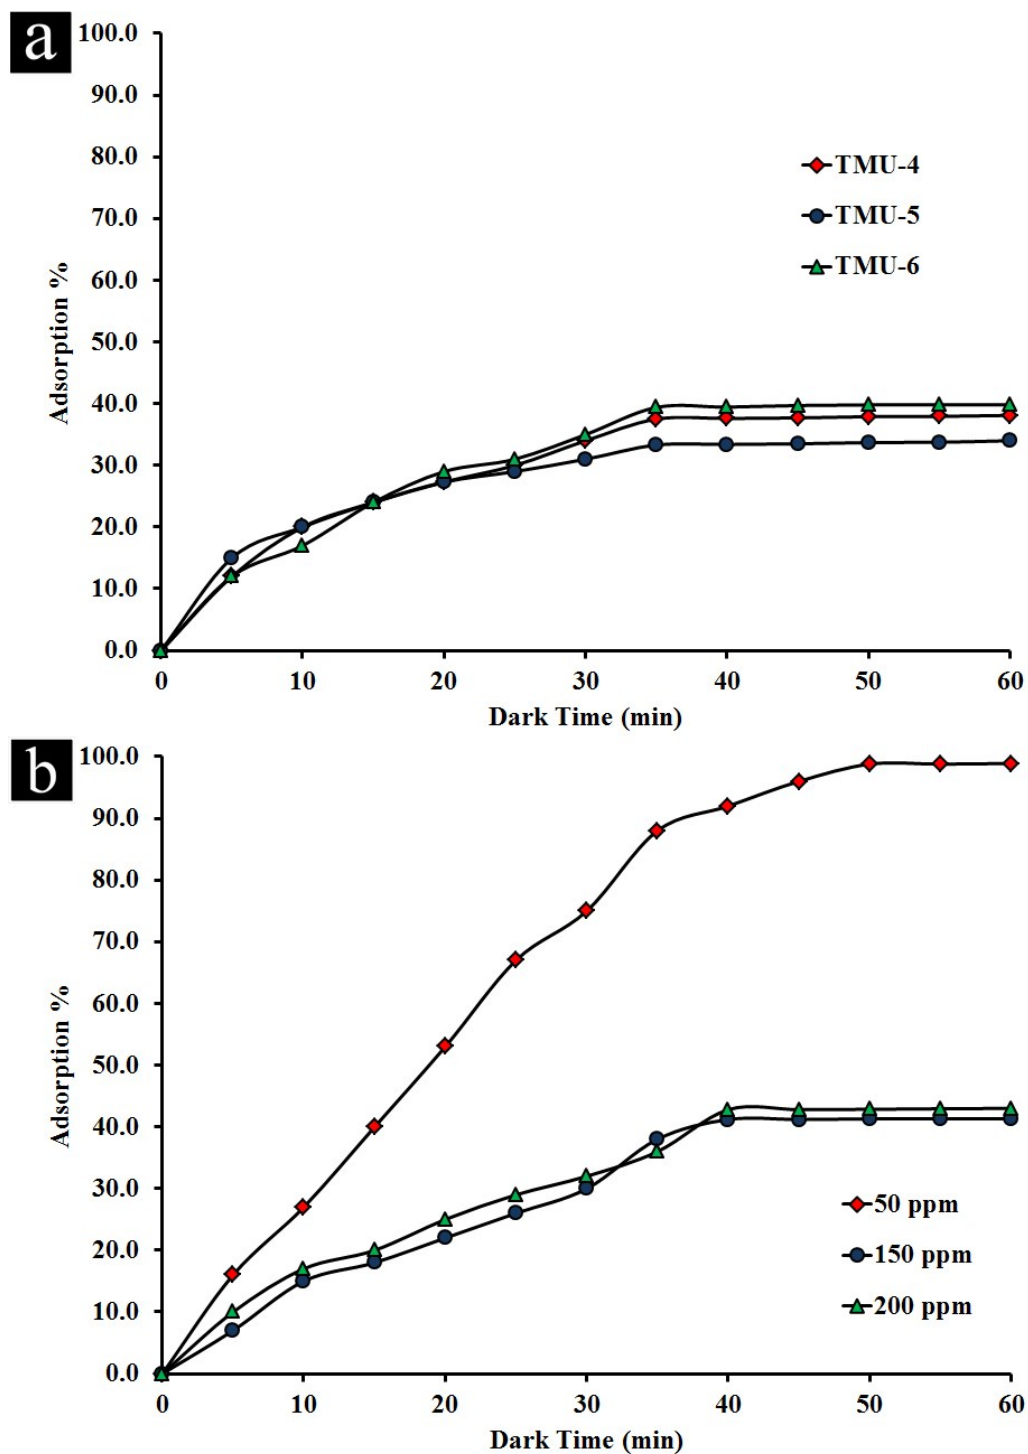

**Fig. S2.** The dark adsorption curves for a) TMU-4, TMU-5 and TMU-6 in presence of 100 ppm CR, b) TMU-6 in presence of various concentrations of CR.

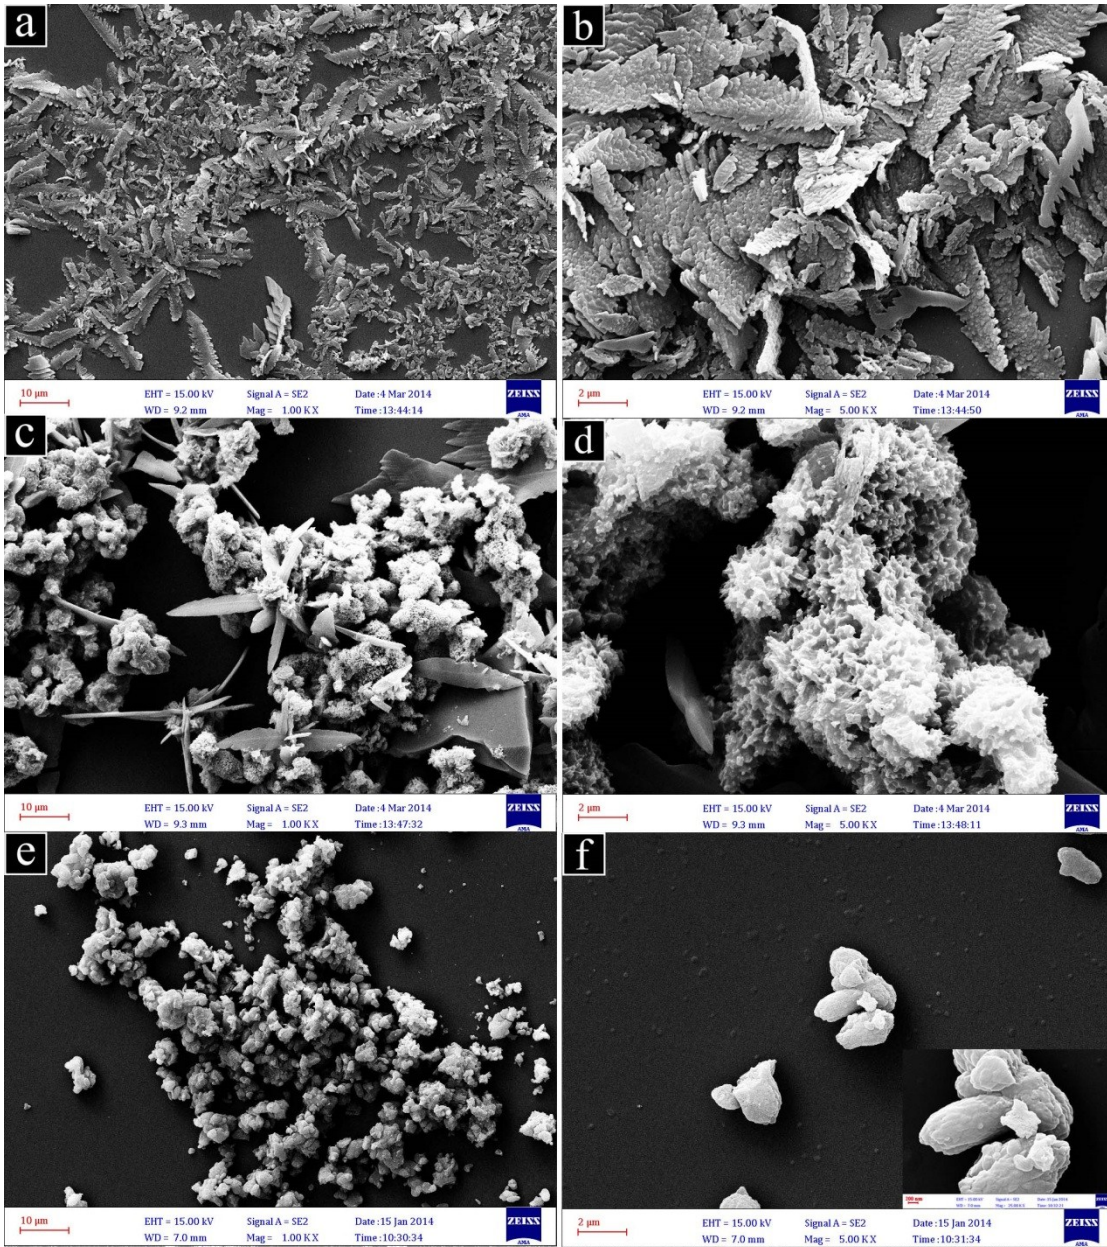

**Fig. S3.** FE-SEM images of (a and b) TMU-4 (c and d) TMU-5 and (e and f) TMU-6 synthesized by mechanochemical reaction (inset is high-magnification image, scale 200 nm).

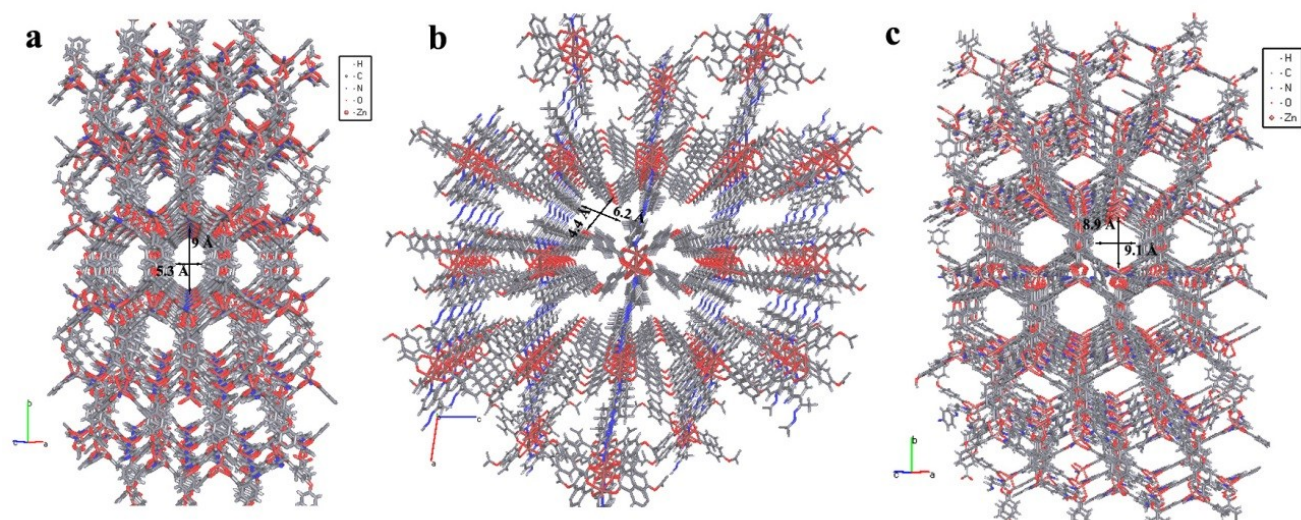

**Fig. S4.** Perspective views of the a) TMU-4, b) TMU-5 and c) TMU-6 structural units.

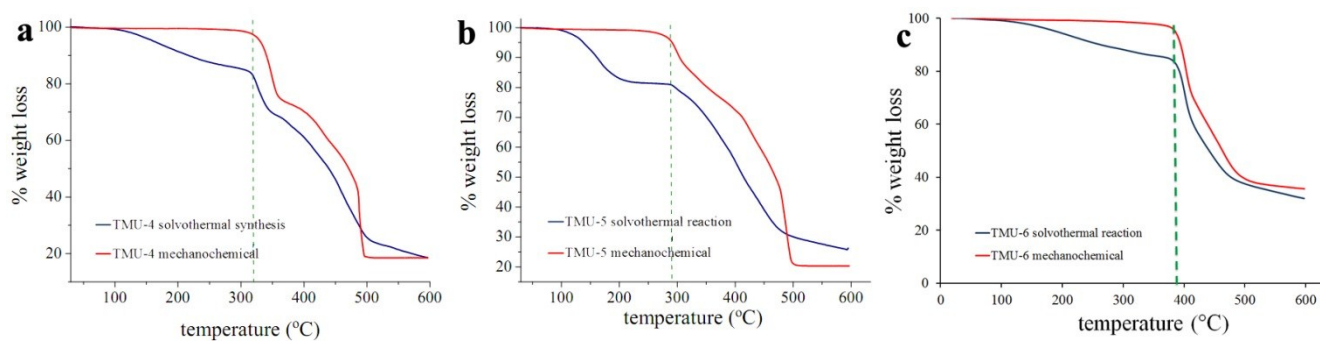

**Fig. S5.** Thermogravimetric profiles of (a) **TMU-4**, (b) **TMU-5** and (c) **TMU-6** isolated by either solvothermal reaction or mechanochemical synthesis. The TGA curve of **TMU-4** (solvothermal reaction) shows a plateau in the range of 30 to 100 °C followed by a continuous loss of 16.5% (expected: 14.6%) up to 315 °C, which can be ascribed to removal of the guest DMF molecules. Similarly, the TGA profile of **TMU-5** also shows a plateau in the range of 30 to 100 °C and a loss of DMF molecules of 18% (expected: 19.9%) in the temperature range of 100 to 190 °C. **TMU-5** is thermally stable up to 290 °C, above which point it begins to decompose. Also **TMU-6** shows a plateau in the range of 30 to 100 °C and a loss of DMF molecules of 16% (expected: 19%) in the temperature range of 100 to 380 °C. The TGA profiles of the mechanochemical synthesized **TMU-4**, **TMU-5** and **TMU-6** show plateaus in the range of 30 to 315 °C, 30 to 290 °C and 30 to 380 °C, respectively, reveal that the first weight loss is correctly attributed to loss of DMF guest molecules.

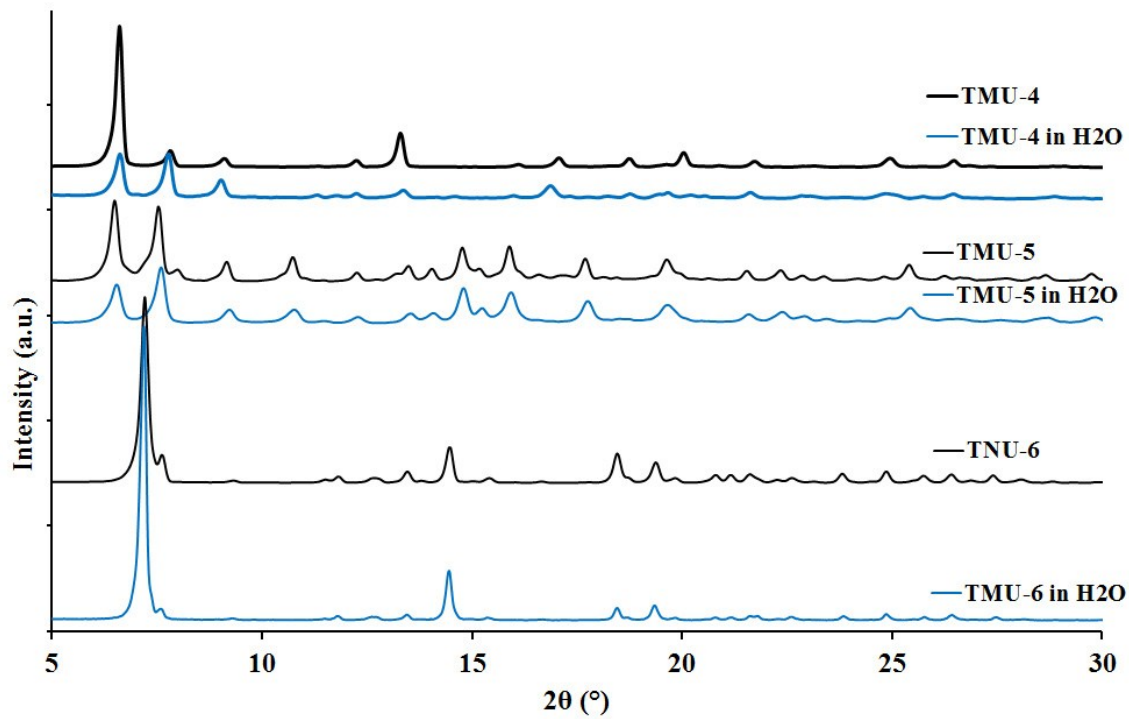

**Fig. S6.** Comparison of XRPD patterns for TMU-4, TMU-5 and TMU-6 before and after immersing in H<sub>2</sub>O for 24 h.

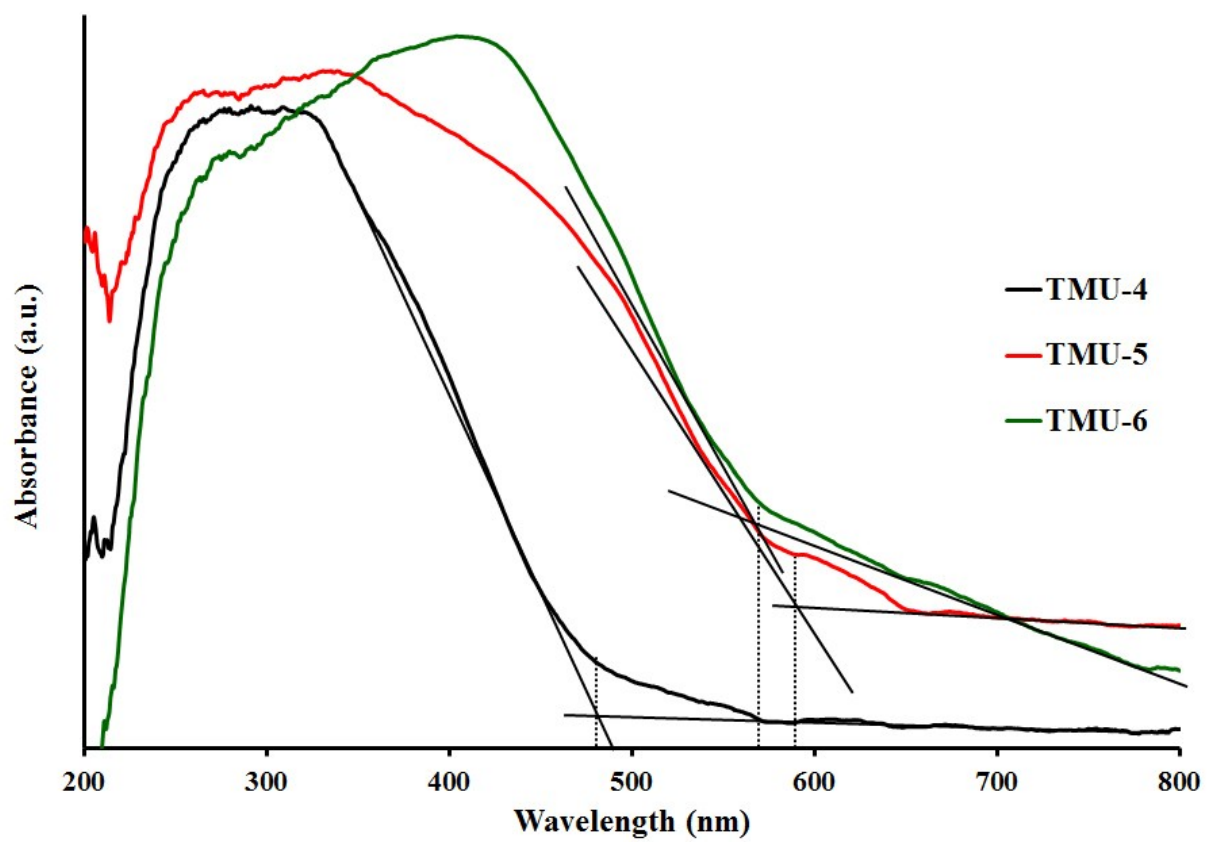

**Fig. S7.** UV-vis diffuse reflectance spectra of the MOFs.



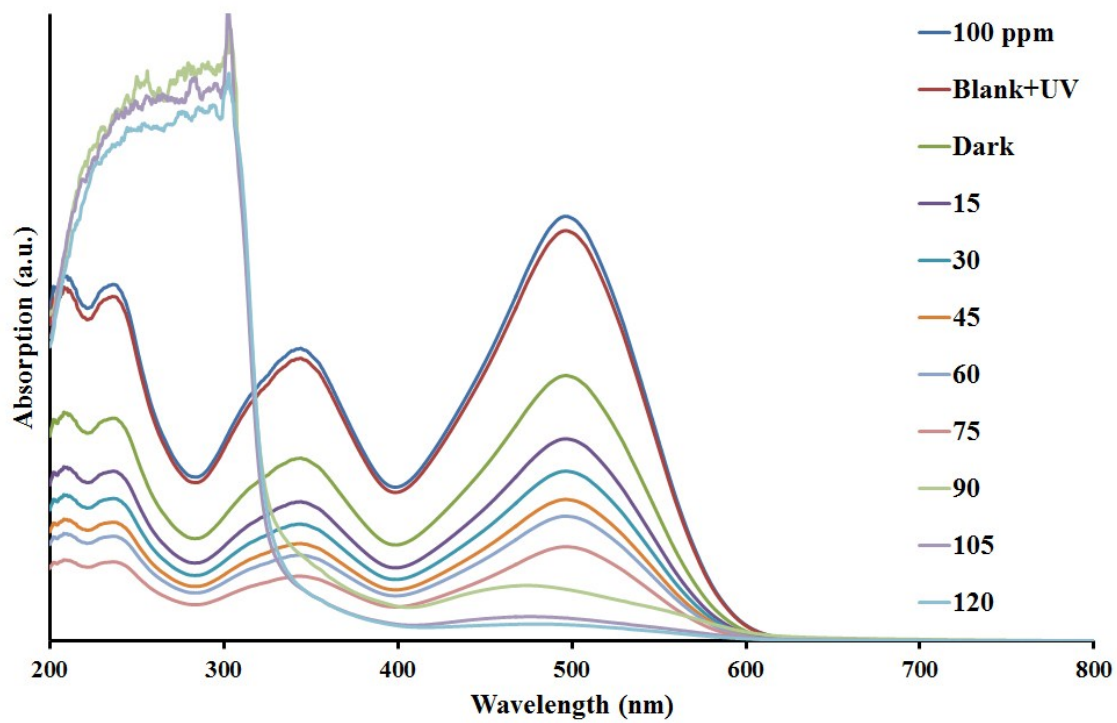

**Fig. S8.** Absorption spectra of a solution of 100 ppm CR in the presence of TMU-4 under UV light irradiation for 120 min.

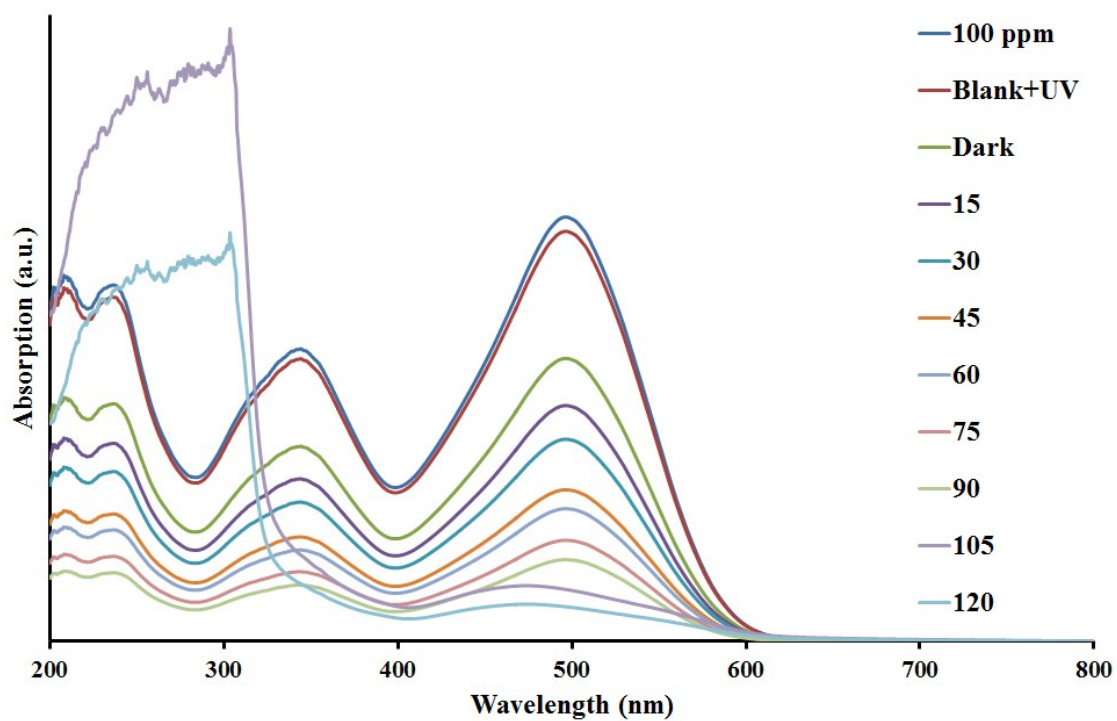

**Fig. S9.** Absorption spectra of a solution of 100 ppm CR in the presence of TMU-5 under UV light irradiation for 120 min.

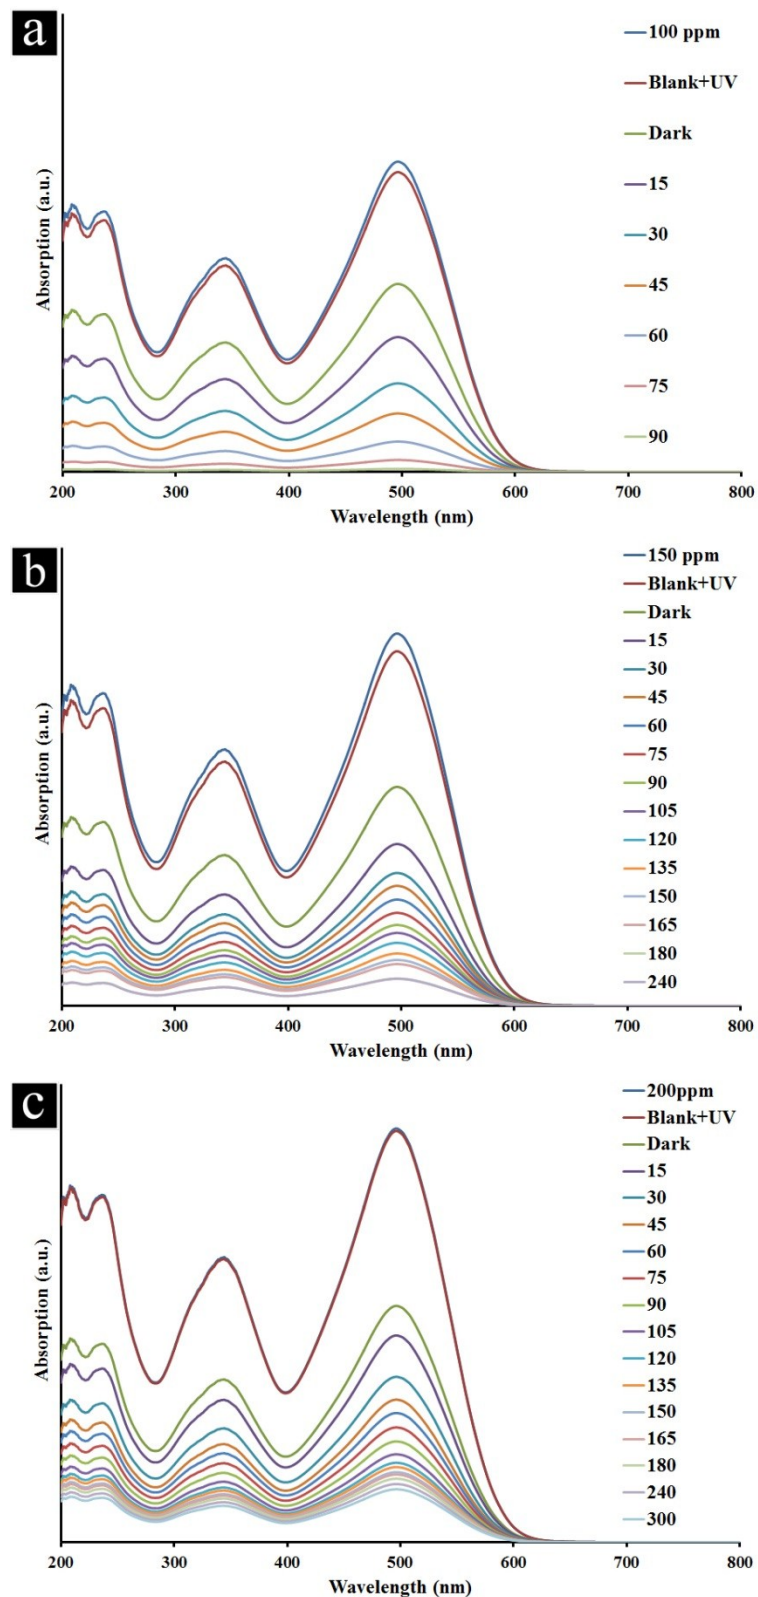

**Fig. S10.** Absorption spectra of a solution of CR with various concentrations in the presence of TMU-6 under UV-light irradiation. a) 100 ppm for 90 min, b) 150 ppm for 240 min and c) 200 ppm of CR for 300 min.

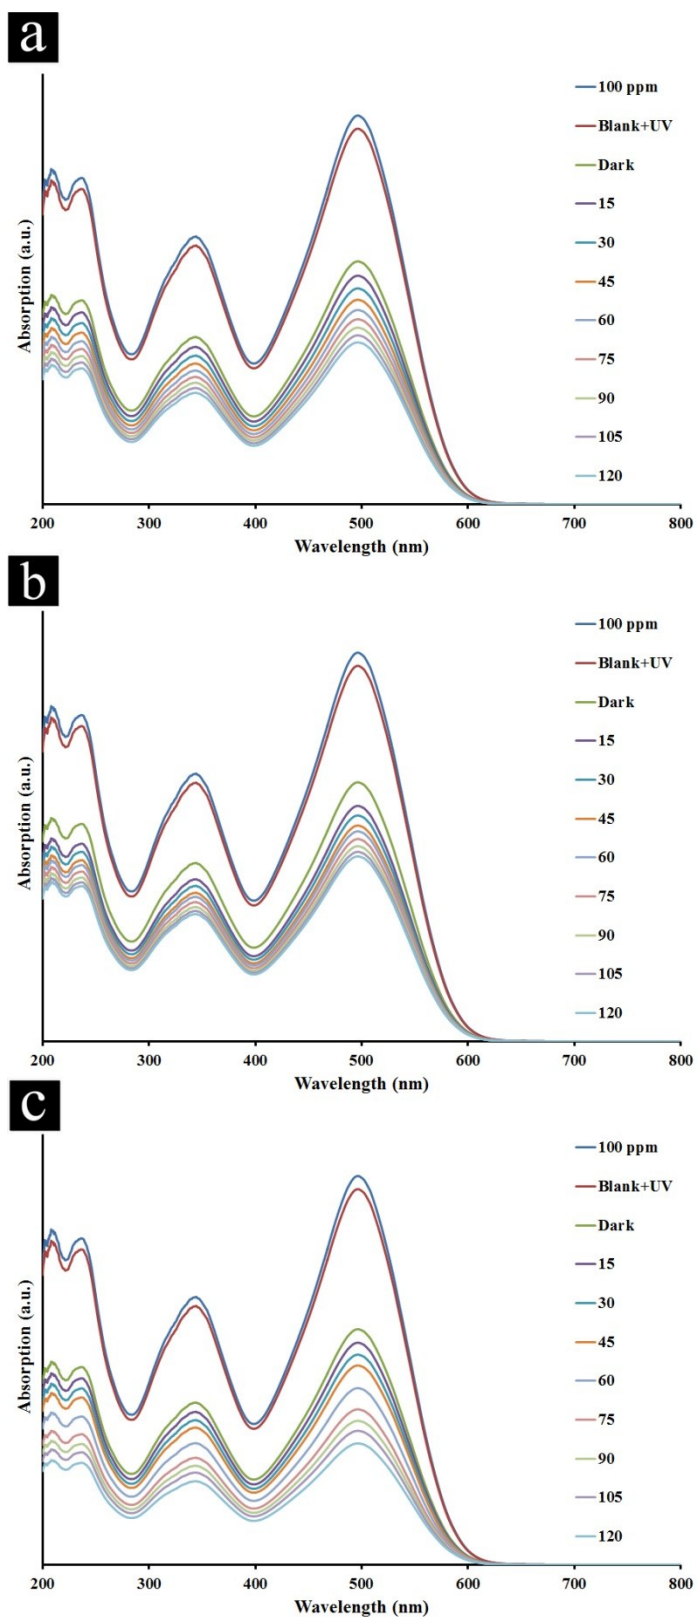

**Fig. S11.** Absorption spectra of a solution of 100 ppm CR in the presence of TMU-4, TMU-5 and TMU-6 under visible light irradiation for 120 min.

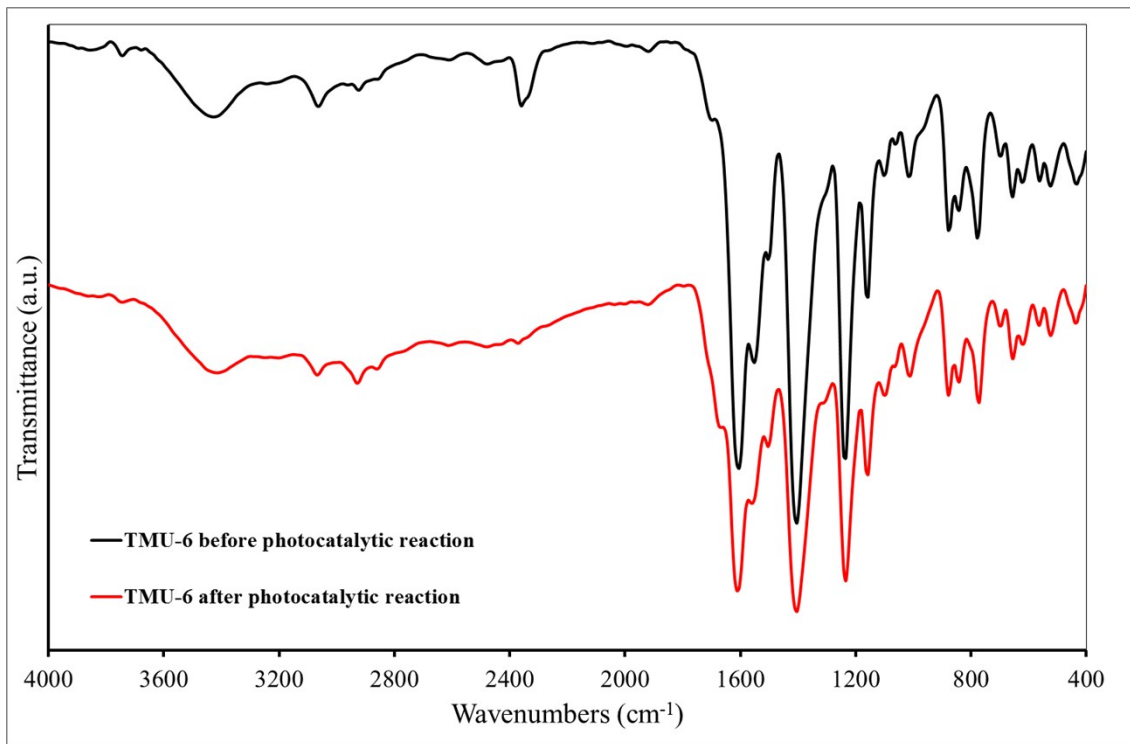

**Fig. S12.** IR spectra for TMU-6 before and after repeating the reaction for four cycles.
